# Supplementary material
Source: PubMed Central journal article supplement (PMC3213908)
Supplement: supp_00589.2010_Revised_Figure_Legend.pdf [file supp_00589.2010_Revised_Figure_Legend.pdf]

## Revised Figure Legend

**Figure 2:** Western blotting analysis of podocyte and endothelial glomerular cell specific proteins in cultured mesangial cells. (A) Shows the expression of podocyte specific proteins including podocin, CD2AP and nephrin in podocytes and mesangial cells. Actin loading control is shown for podocin and CD2AP. Nephrin blot was performed using nephrin immunoprecipitation (black line indicates where irrelevant lanes have removed) (B) Shows the expression of VE-cadherin, an endothelial marker, in mesangial and endothelial cells. Actin was used as a loading control in A and B, and whole glomeruli as a positive control for all proteins except for CD2AP we used HEK cells (Human Embryonic Kidney) as a positive control. Podocytes and not mesangial cells expressed CD2AP, Podocin and Nephrin. (B) VE-cadherin is expressed only in endothelial cells and not in mesangial cells. These results validate the staining results and provide further evidence of the establishment of a mesangial specific cell line in culture.
