# Supplementary material
Source: PubMed Central journal article supplement (PMC3213908)
Supplement: supp_00589.2010_Revised_Materials_and_Methods.pdf [file supp_00589.2010_Revised_Materials_and_Methods.pdf]

## Revised Materials and Methods

### Western blotting

For the nephrin immunoprecipitation assay, cells were extracted in ice-cold NP40 (Nonidet P40) extraction buffer (50 mM Tris/HCl, pH 7.5, containing 1 mM EDTA, 120 mM NaCl, 50 mM NaF, 1 mM benzamidine, 1% NP40, 1 mM microcystin, 7.2 mM 2-mercaptoethanol, 5 mM orthovanadate and 1 mg/ml each of pepstatin, leupeptin and antipain). Cell extracts were centrifuged at 10000g for 10 min at 4 °C prior to Nephrin being immunoprecipitated with mouse anti-nephrin antibody and Protein G –Sepharose at 4°C. Subsequently the beads were isolated by centrifugation and washed four times with NP40 extraction buffer. The bound proteins were separated by SDS PAGE followed by electrophoretic transfer to Immobilon-P membrane (Millipore, Watford, U.K.). The membranes were blocked in 10% (w/v) BSA dissolved in TBS-T (Tris-buffered saline with 0.1% Tween 20; 20 mM Tris/HCl, 137 mM NaCl and 0.1% Tween 20) and subsequently incubated with anti nephrin antibody followed by (HRP)-conjugated donkey anti-rabbit IgG. The signal was detected by enhanced chemiluminescence (Amersham Biosciences).
