# Supplementary material
Source: PubMed Central journal article supplement (PMC3213908)

**A**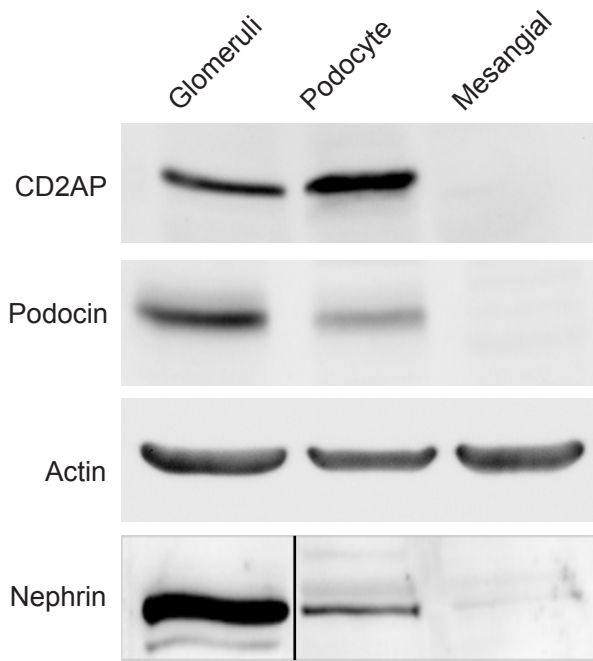**B**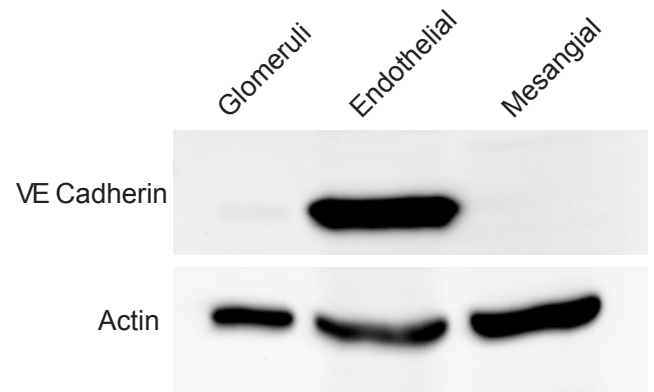

Supplement: supp_00589.2010_Figure_2_revised.pdf [file supp_00589.2010_Figure_2_revised.pdf]
